# Supplementary material for: Standardising Breast Radiotherapy Structure Naming Conventions: A Machine Learning Approach
Source: bioRxiv or medRxiv preprint supplement (doi:10.1101/2022.10.14.22280859), 2022-10-15
Supplement: Supplementary file [file media-1.pdf]

## Appendix A. Standardised Breast Radiotherapy Structures Names

Table A. 1 Classes utilized in each dataset.

| Structure          | Dataset 1 | Dataset 2 | Dataset 3 | Dataset 4 | Dataset 5 |
|--------------------|-----------|-----------|-----------|-----------|-----------|
| axilla ctv         | -         | -         | X         | X         | X         |
| axilla ptv         | -         | -         | X         | X         | X         |
| boost structure    | -         | -         | -         | X         | X         |
| breast ctv         | -         | X         | X         | X         | X         |
| breast ptv         | -         | X         | X         | X         | X         |
| chestwall ctv      | -         | X         | X         | X         | X         |
| chestwall ptv      | -         | X         | X         | X         | X         |
| combined lungs     | X         | X         | X         | X         | X         |
| combined structure | -         | -         | -         | X         | X         |
| contralateral      | X         | X         | X         | X         | X         |
| control structure  | -         | -         | -         | X         | X         |
| exclude            | -         | -         | -         | -         | X         |
| heart              | X         | X         | X         | X         | X         |
| imc ctv            | -         | -         | X         | X         | X         |
| imc ptv            | -         | -         | X         | X         | X         |
| left lung          | X         | X         | X         | X         | X         |
| right lung         | X         | X         | X         | X         | X         |
| scf ctv            | -         | -         | X         | X         | X         |
| scf ptv            | -         | -         | X         | X         | X         |
| tumourbed ctv      | -         | X         | X         | X         | X         |
| tumourbed ptv      | -         | X         | X         | X         | X         |
| Total              | 5         | 11        | 17        | 20        | 21        |

## Appendix B. Experiments and Results

Table B. 1 Experiments conducted in each case study.

| Case study | Features                       | Type of the network          |
|------------|--------------------------------|------------------------------|
| 1          | Text                           | Feed forward neural network  |
| 2          | Dose                           | Feed forward neural network  |
| 3          | Geometry                       | Feed forward neural network  |
| 4          | Images                         | Convolutional neural network |
| 5          | Text + dose                    | Feed forward neural network  |
| 6          | Text + geometry                | Feed forward neural network  |
| 7          | Text + images                  | Multi-input neural network   |
| 8          | Geometry + dose                | Feed forward neural network  |
| 9          | Dose + image                   | Multi-input neural network   |
| 10         | Geometry + image               | Multi-input neural network   |
| 11         | Text + geometry + dose         | Feed forward neural network  |
| 12         | Text + dose + image            | Multi-input neural network   |
| 13         | Text + geometry + image        | Multi-input neural network   |
| 14         | Geometry + dose + image        | Multi-input neural network   |
| 15         | Text + dose + geometry + image | Multi-input neural network   |

Table B. 2 list of misclassified volumes predicted by the best performing model over the test dataset (study 5).

| Structure name         | Structure category/class | Predicted category/class name | Probability |
|------------------------|--------------------------|-------------------------------|-------------|
| PTV_RTAXILLA           | axilla_ptv_approved      | combined_structure            | 0.611028    |
| SCLAV_PTV              | scf_ptv_approved         | exclude                       | 0.704626    |
| SCLAV_PTV              | scf_ptv_approved         | exclude                       | 0.520875    |
| RO_SEROMA              | tumourbed_ctv_approved   | exclude                       | 1           |
| PTV42,4old             | exclude                  | breast_ptv_approved           | 0.975655    |
| ChestwallAx_CTV        | combined_structure       | axilla_ctv_approved           | 0.81999     |
| lung0.5                | exclude                  | left_lung_approved            | 0.999727    |
| PTV_NODES_02           | breast_ptv_approved      | exclude                       | 0.717039    |
| L_BTREAST_PTV          | breast_ptv_approved      | exclude                       | 0.987708    |
| LEVEL_3_NODE_CTV_BOOST | boost_structure          | exclude                       | 0.934735    |

Table B. 3 list of misclassified samples by the best performing model over the extended test dataset.

| Structure name     | Structure category/class | Predicted category/class name | Probability |
|--------------------|--------------------------|-------------------------------|-------------|
| PTV_RTAXILLA       | axilla_ptv_approved      | combined_structure            | 0.669003    |
| SCLAV_PTV          | scf_ptv_approved         | breast_ptv_approved           | 0.889554    |
| PTV42,4            | breast_ptv_approved      | exclude                       | 0.536556    |
| PTV_EVAL_STARS     | breast_ptv               | exclude                       | 0.984457    |
| SCLAV_PTV          | scf_ptv_approved         | breast_ptv_approved           | 0.692799    |
| RO_SEROMA          | tumourbed_ctv_approved   | exclude                       | 1           |
| PTV42,4old         | exclude                  | breast_ptv_approved           | 0.981575    |
| PTV_TUMOURBEDBOOST | boost_structure          | tumourbed_ctv_approved        | 0.729915    |
| EXT-PTV            | breast_ptv               | exclude                       | 0.999907    |
| ChestwallAx_CTV    | combined_structure       | breast_ctv_approved           | 0.554923    |
| ChestwallAx_PTV    | combined_structure       | breast_ptv_approved           | 0.557953    |

|               |                     |                     |          |
|---------------|---------------------|---------------------|----------|
| lung0.5       | exclude             | left_lung_approved  | 0.992461 |
| CTV_IP_NODES  | breast_ctv          | exclude             | 0.999103 |
| PTV60_RING    | exclude             | breast_ptv_approved | 0.786016 |
| L_BTREAST_PTV | breast_ptv_approved | exclude             | 0.952107 |
| PTV42,4_EVAL  | breast_ptv          | exclude             | 0.510468 |
| PTVLD_EVAL    | breast_ptv          | exclude             | 0.945179 |
| PTVLD_EVAL    | breast_ptv          | exclude             | 0.892079 |
| REG_CTV_L_SCV | scf_ctv             | exclude             | 0.999954 |

Table B. 4 Time taken to train each model in each dataset (in seconds).

| case study               | dataset 1 | dataset 2 | dataset 3 | dataset 4 | dataset 5 |
|--------------------------|-----------|-----------|-----------|-----------|-----------|
| text                     | 120       | 196       | 129       | 303       | 465       |
| dose                     | 125       | 191       | 204       | 293       | 479       |
| geometry                 | 124       | 183       | 242       | 301       | 478       |
| images                   | 933       | 2346      | 2481      | 3872      | 9782      |
| text_dose                | 62        | 106       | 193       | 272       | 432       |
| text_geometry            | 88        | 155       | 274       | 262       | 465       |
| text_image               | 685       | 1130      | 1603      | 2551      | 3931      |
| geometry_dose            | 117       | 192       | 276       | 289       | 472       |
| dose_image               | 1141      | 910       | 740       | 2310      | 8332      |
| geometry_image           | 2529      | 1831      | 1660      | 4694      | 8064      |
| text_geometry_dose       | 82        | 168       | 260       | 240       | 382       |
| text_dose_image          | 811       | 1336      | 1665      | 1286      | 3034      |
| text_geometry_image      | 830       | 992       | 1274      | 1361      | 3914      |
| geometry_dose_image      | 503       | 1510      | 2215      | 4148      | 4673      |
| text_dose_geometry_image | 366       | 1000      | 1067      | 1529      | 3895      |

Table B. 5 Classification report of the best performing model over the extended dataset (text+dose+image)

| classes                 | f1-score | precision | recall | support |
|-------------------------|----------|-----------|--------|---------|
| axilla_ctv_approved     | 1        | 1         | 1      | 27      |
| axilla_ptv_approved     | 0        | 0         | 0      | 1       |
| boost_structure         | 0.91     | 1         | 0.83   | 6       |
| breast_ctv_approved     | 1        | 1         | 1      | 260     |
| breast_ptv_approved     | 0.97     | 0.98      | 0.97   | 236     |
| chestwall_ctv_approved  | 1        | 1         | 1      | 42      |
| chestwall_ptv_approved  | 1        | 1         | 1      | 5       |
| combined_lungs_approved | 1        | 1         | 1      | 174     |
| combined_structure      | 0.73     | 0.8       | 0.67   | 6       |
| contralateral_approved  | 1        | 1         | 1      | 80      |
| control_structure       | 1        | 1         | 1      | 530     |
| exclude                 | 0.99     | 0.99      | 1      | 1152    |
| heart_approved          | 1        | 1         | 1      | 166     |
| imc_ctv_approved        | 1        | 1         | 1      | 45      |

|                        |      |      |      |      |
|------------------------|------|------|------|------|
| imc_ptv_approved       | 1    | 1    | 1    | 5    |
| left_lung_approved     | 1    | 0.99 | 1    | 172  |
| right_lung_approved    | 1    | 1    | 1    | 172  |
| scf_ctv_approved       | 0.99 | 1    | 0.98 | 59   |
| scf_ptv_approved       | 0.5  | 1    | 0.33 | 3    |
| tumourbed_ctv_approved | 0.99 | 0.99 | 0.99 | 107  |
| tumourbed_ptv_approved | 1    | 1    | 1    | 7    |
| micro avg              | 0.99 | 0.99 | 0.99 | 3255 |
| macro avg              | 0.91 | 0.94 | 0.89 | 3255 |
| weighted avg           | 0.99 | 0.99 | 0.99 | 3255 |
